# Supplementary material for: Case Report of Leprosy in Central Florida, USA, 2022
Source: PubMed Central journal article supplement (PMC10370849; doi:10.3201/eid2908.220367), 2023-08
Supplement: 22-0367-Techapp-s1.pdf [file 22-0367-Techapp-s1.pdf]

*EID cannot ensure accessibility for supplementary materials supplied by authors. Readers who have difficulty accessing supplementary content should contact the authors for assistance.*

# Case Report of Leprosy in Central Florida, USA, 2022

## Appendix

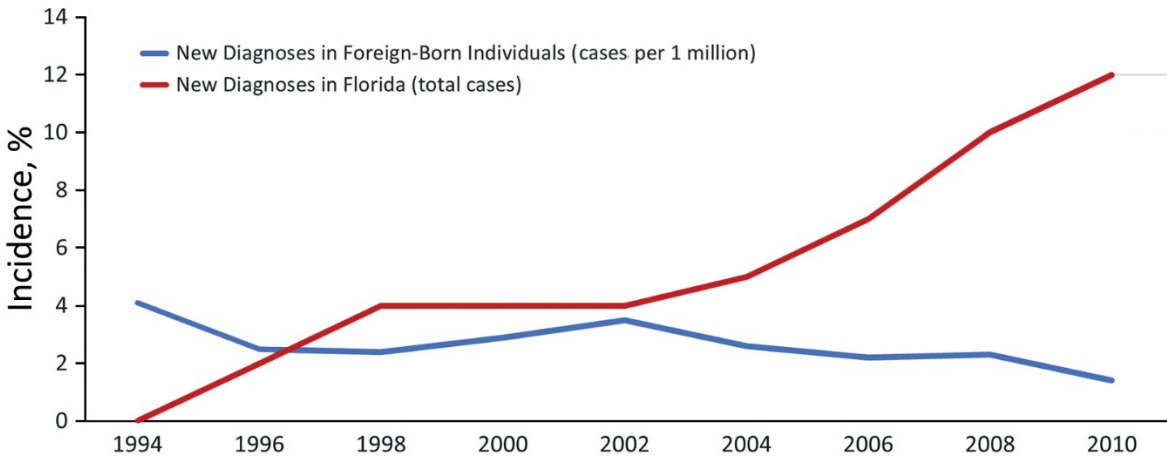

**Appendix Figure.** Decreasing number of new diagnoses of leprosy in foreign-born individuals in the United States as the overall incidence increases in Florida during 1994–2010.
